# Supplementary material for: Estimating freshwater flux amplification with ocean tracers via linear response theory
Source: Copernicus journal article supplement (doi:10.5194/esd-15-323-2024), 2024-04-02
Supplement: Supplementary file 1 [file esd-15-323-2024-supplement.pdf]

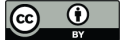

*Supplement of*

## **Estimating freshwater flux amplification with ocean tracers via linear response theory**

**Aurora Basinski-Ferris and Laure Zanna**

*Correspondence to:* Aurora Basinski-Ferris (abf376@nyu.edu)

The copyright of individual parts of the supplement might differ from the article licence.

## 1 S1 Maps of salinity change in each FAFMIP experiment

2 In Fig. 4 in the main text, we show the change in surface salinity in each GMM region (based on CESM data)  
3 for each FAFMIP experiment and each ocean model. Here, in Fig. S1, we show this plot on maps; in other  
4 words, we show the salinity change from each FAFMIP experiment and for each ocean model on a map based  
5 on the CESM mixtures.

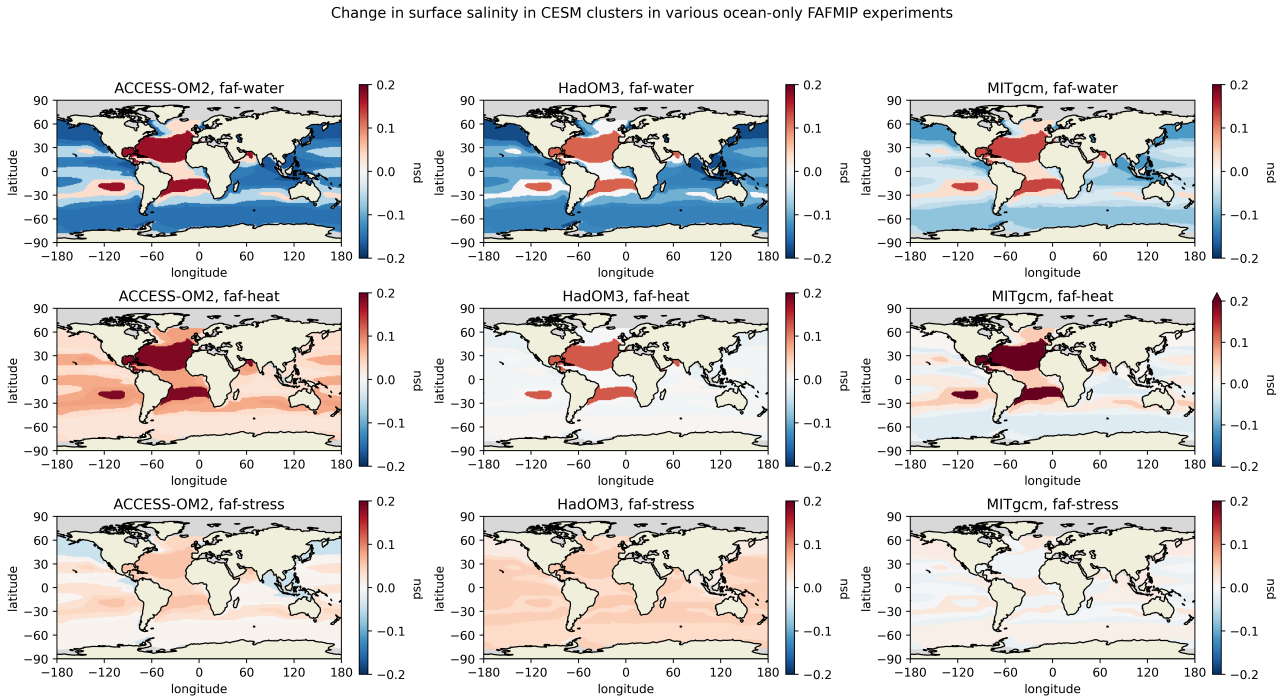

Figure S1: Surface salinity in the last decade of a forced run (mean) compared to the last decade of a control run (mean) for each FAFMIP experiment and each ocean-only model in the mixtures based on CESM ensemble mean data (see Fig. 3b in the main text). The rows are the FAFMIP experiments *faf-water*, *faf-heat*, and *faf-stress*; the columns are the models ACCESS-OM2, HadOM3, and MITgcm. This figure is Fig. 4 in the main text but displayed on maps.

## 6 S2 Equivalents to Figures 4 and 5 with IAP regions

7 In the main text, we evaluated the hypothesis that (heat flux induced) circulation change imprints regionally  
8 on the surface salinity pattern using regions found by a GMM fit to CESM ensemble mean data (Fig. 4). We  
9 also used these regions to evaluate the linearity assumption that the separate imposition of freshwater flux, heat  
10 flux and wind stress forcings are approximately equivalent to all forcings imposed at once (Fig. 5). Here, we  
11 show analogous plots but for regions found by the GMM fit to the IAP data.

12 In Fig. S2, we show the change in salinity and temperature due to individual forcings in regions found by  
13 a GMM fit to the IAP data. Similar to the plot with regions based on the GMM fit to CESM data (Fig. 4),  
14 we find that heat fluxes have the strongest imprint in the saltiest regions (mixture 6) while freshwater fluxes  
15 makes fresher (saltier) regions fresher (saltier).

16 In Fig. S3, we assess the linearity assumption that the separate imposition of forcings (*'faf-stress+faf-*  
17 *water+faf-heat'*) is equivalent to all forcings applied at once (*'faf-all'*) using the regions found by a GMM fit to  
18 the IAP data. As in text (Fig. 5), we find that there is good agreement between the sum of individual forcings  
19 and forcings applied together except for in the sixth mixture for the HadOM3 model, where there is a non-linear  
20 response.

## 21 S3 Change in temperature in each region due to different forcings

22 In the main text, we showed the change in salinity in each region between the end of forced experiments and  
23 the end of control run for the three ocean-only FAFMIP models (Fig. 4). Here, in Fig. S4, we show the same  
24 results for the surface temperature. We find that different forcings affect the pattern of surface temperature  
25 distinctly. However, unlike salinity, the scale of change due to temperature is an order of magnitude larger than

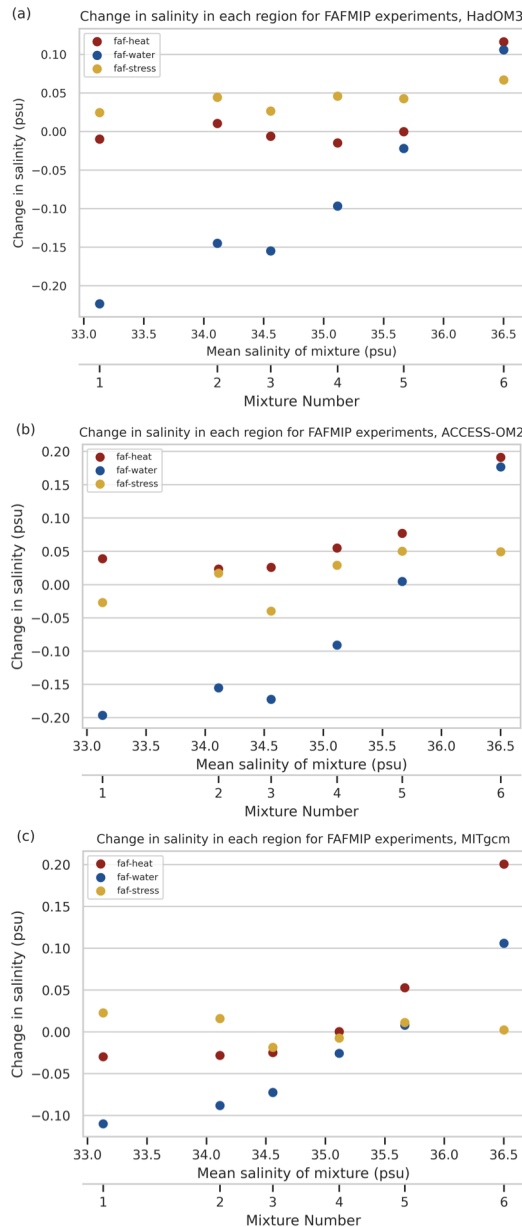

Figure S2: The change in surface salinity in each region from the GMM applied to the IAP data (Fig. 3d) for each individual forcing experiment. The heat flux experiment (faf-heat) is shown in red, freshwater flux (faf-water) in blue, and wind stress perturbation (faf-stress) in yellow. The response is defined as the difference between the last decade of a forced run and the last decade of the control run. Panel a-c show the results for ocean models HadOM3, ACCESS-OM2, and MITgcm respectively.

26 other forcings, whereas for salinity the scale of change due to heat flux and freshwater flux are the same in the  
 27 saltiest regions.

## 28 S4 Additional testing on individual CESM members

29 In the main text, we showed the comparison of the true freshwater fluxes, as determined by the target metric  
 30 defined in Eq. (10), and the linear response theory results for ensemble members for which the salinity trends  
 31 met the significance criteria. Here, in Fig. S5, we show the application to all ensemble members regardless of  
 32 the significance of their salinity trends. We see that many members, but not all, capture the true response. As  
 33 shown in text, if we restrict to members with sufficiently large signal to noise ratios, the correct response can  
 34 be recovered.

35 We also test this method on the CESM ensemble data over the period 2011 to 2055. The forcing over this  
 36 period is stronger, and thus more ensemble members meet the significance criteria determined in the main text.  
 37 In Fig. S6, we show a comparable plot to Fig. 9 in the main text but over the period 2011 to 2055. Here, we

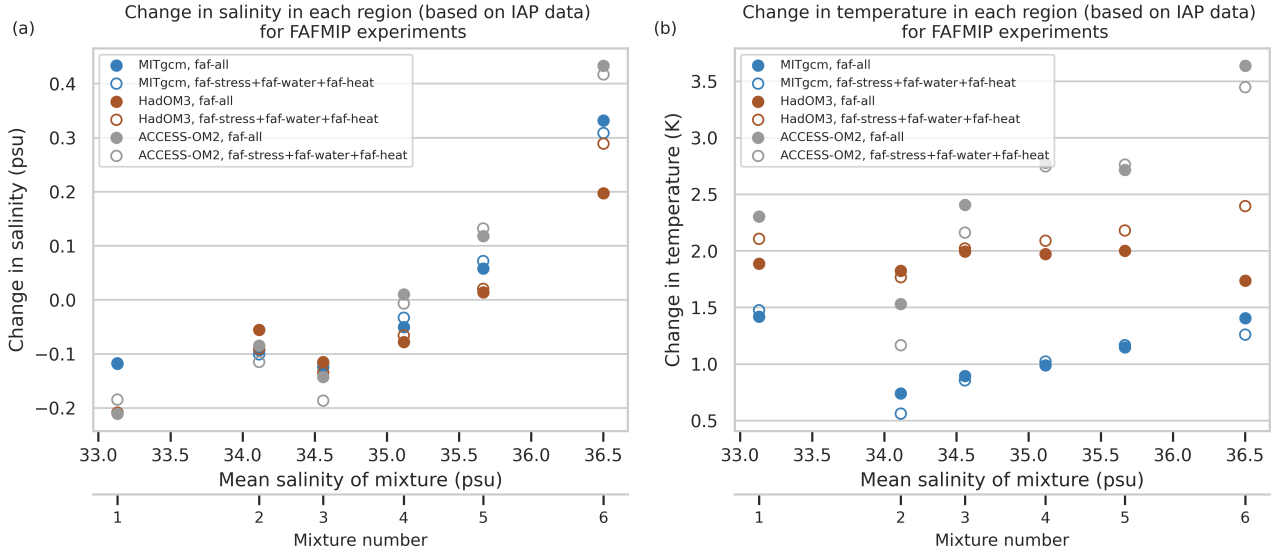

Figure S3: Comparing the surface salinity response (a) and surface temperature response (b) in each region between two cases: the sum of the response when forcings are applied individually (faf-stress+faf-water+faf-heat) and the response to all forcings applied at once (faf-all). The response is defined as the difference between the last decade of a forced run and the last decade of the control run. The response is largely linear with the exception of the sixth mixture for the HadOM3 model. Here the regions are found by a GMM fit to the IAP data.

38 apply the salinity trend significance criteria and exclude 3 members. We find that the true response is captured  
 39 with the exception of members 4, 11, and 34 – thus, it is captured in 90.3% of members.

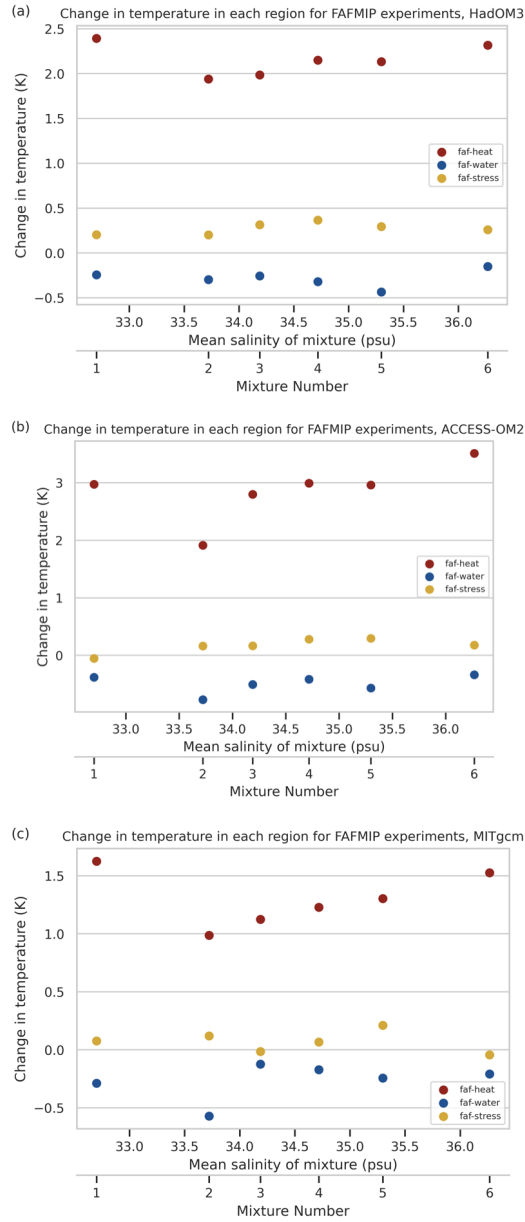

Figure S4: The change in surface temperature in each region from the GMM applied to the CESM data for each individual forcing experiment. The heat flux experiment (faf-heat) is shown in red, freshwater flux (faf-water) in blue, and wind stress perturbation (faf-stress) in yellow. The response is defined as the difference between the last decade of a forced run and the last decade of the control run. Panel a-c show the results for ocean models HadOM3, ACCESS-OM2, and MITgcm respectively.

Freshwater flux as a proportion of FAFMIP perturbation for each ensemble member  
 Block bootstrapping with 3000 new time series and blocks of size 2 years

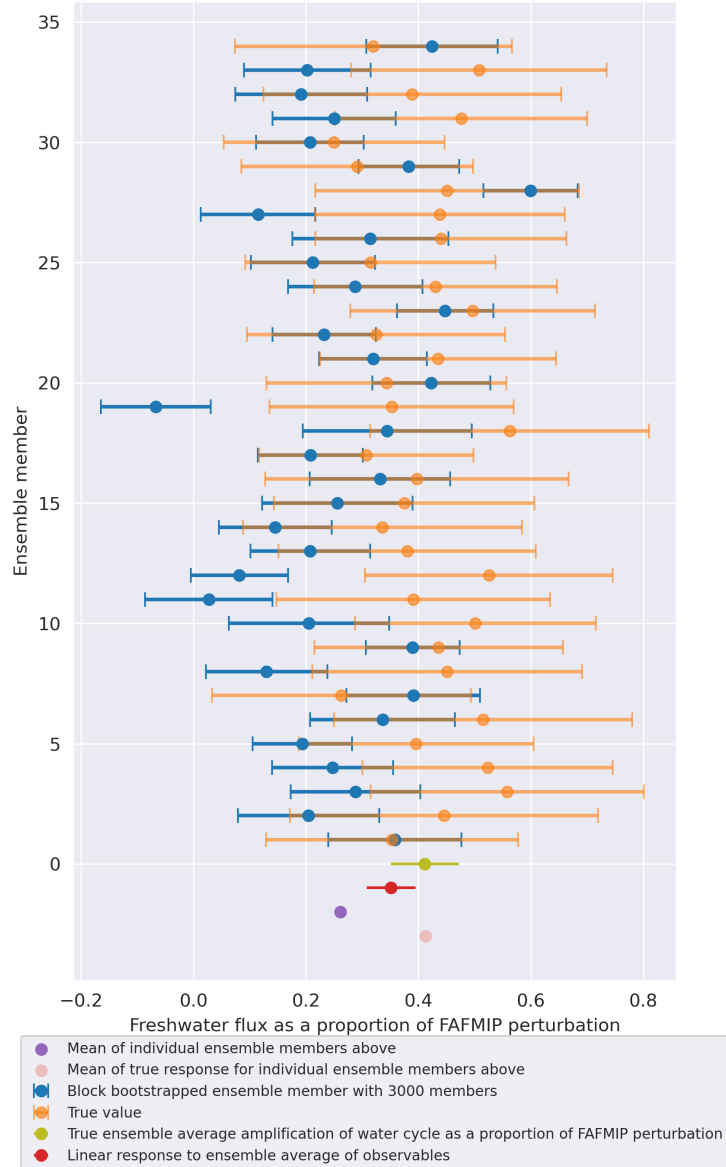

Figure S5: Freshwater flux responses over the period 1975 to 2019 for individual CESM ensemble members following our methodology described in text (blue) compared to truth from E-P model fields (orange). This plot can be compared to Fig. 9 in the main text which plots only members which met the significance criteria for salinity trends.

Freshwater flux as a proportion of FAFMIP perturbation for each ensemble member  
 Block bootstrapping with 3000 new time series and blocks of size 2 years, period 2011 to 2055

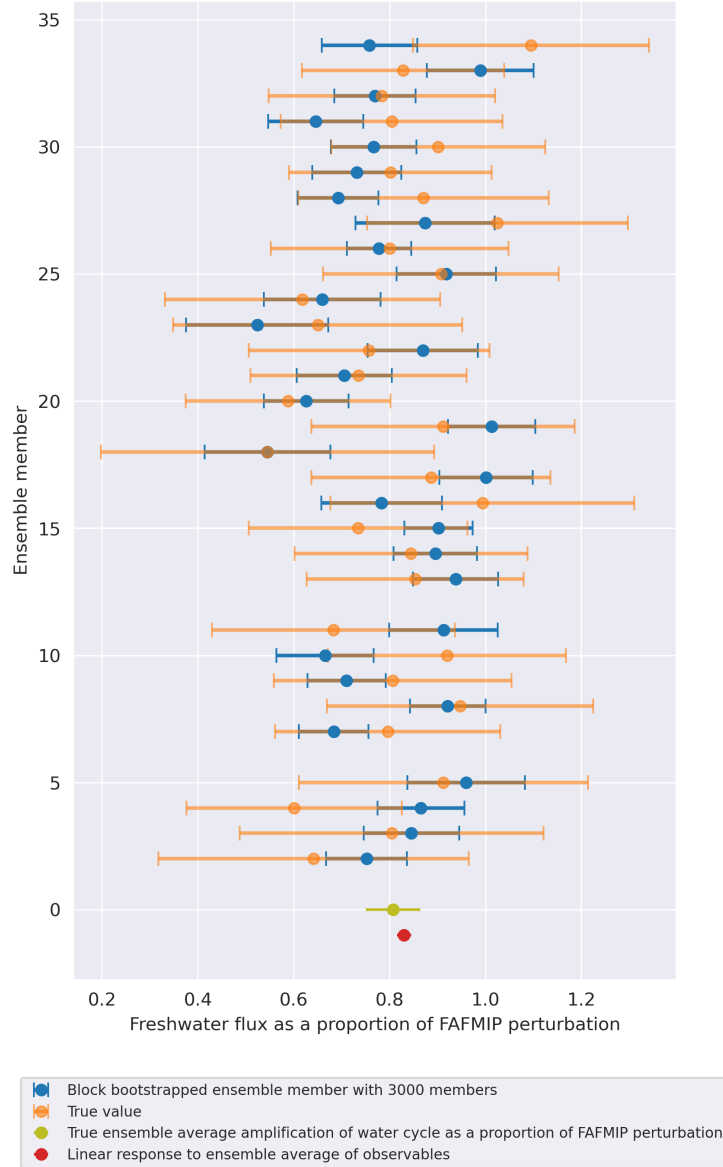

Figure S6: Freshwater flux responses over the period 2011 to 2055 (RCP8.5 pathway) for individual CESM ensemble members following our methodology described in text (blue) compared to truth from E-P model fields (orange). Here, we only plot members which met salinity significance criteria, and thus dropped 3 members.
